# Supplementary material for: Double-strand break repair and colorectal cancer: gene variants within 3′ UTRs and microRNAs binding as modulators of cancer risk and clinical outcome
Source: PubMed Central journal article supplement (PMC5029617; doi:10.18632/oncotarget.6804), 2015-12-31
Supplement: oncotarget-07-23156-s001.pdf [file oncotarget-07-23156-s001.pdf]

## Double-strand break repair and colorectal cancer: gene variants within 3' UTRs and microRNAs binding as modulators of cancer risk and clinical outcome

### Supplementary Materials

**Supplementary Table SI: Association of SNPs in HRe genes with CRC risk.** A further stratification for colon and rectal cancer is also presented

**Supplementary Table SII: Association of SNPs in NHEJ genes with CRC risk.** A further stratification for tumor site is also presented

**Supplementary Table SIII: Combined  $2 \times 2$  contingency tables showing the distribution of rs2155209 genotypes of *MRE11A* with that of other SNPs in genes of the HRe pathway: only the relevant associations are reported**

| <i>MRE11A</i> rs2155209 (Cases/Controls) |          |                                                         |                                                         |                                                          |
|------------------------------------------|----------|---------------------------------------------------------|---------------------------------------------------------|----------------------------------------------------------|
|                                          | Genotype | TT                                                      | TC                                                      | CC                                                       |
| <b><i>RAD52</i><br/>rs1051669</b>        | GG       | (285/344)<br>OR = 1.13, $\chi^2 = 1.67$ ,<br>$p = 0.20$ | (269/376)<br>OR = 0.93, $\chi^2 = 0.70$ ,<br>$p = 0.40$ | (43/103)<br>OR = 0.53, $\chi^2 = 11.81$ ,<br>$p < 0.001$ |
|                                          | GA       | (170/221)<br>OR = 1.02, $\chi^2 = 0.03$ ,<br>$p = 0.87$ | (169/211)<br>OR = 1.07, $\chi^2 = 0.34$ ,<br>$p = 0.56$ | (39/67)<br>OR = 0.76, $\chi^2 = 1.80$ ,<br>$p = 0.18$    |
|                                          | AA       | (31/29)<br>OR = 1.42, $\chi^2 = 1.84$ ,<br>$p = 0.18$   | (41/33)<br>OR = 1.67, $\chi^2 = 4.71$ ,<br>$p = 0.03$   | (7/7)<br>OR = 1.32, $\chi^2 = 0.27$ ,<br>$p = 0.60$      |
| <b><i>RAD52</i><br/>rs11571475</b>       | TT       | (369/442)<br>OR = 1.16, $\chi^2 = 2.99$ ,<br>$p = 0.08$ | (354/458)<br>OR = 1.03, $\chi^2 = 0.15$ ,<br>$p = 0.69$ | (81/126)<br>OR = 0.84, $\chi^2 = 1.41$ ,<br>$p = 0.24$   |
|                                          | TC       | (114/151)<br>OR = 1, $\chi^2 = 0$ ,<br>$p = 0.99$       | (109/152)<br>OR = 0.94, $\chi^2 = 0.19$ ,<br>$p = 0.66$ | (10/46)<br>OR = 0.28, $\chi^2 = 14.82$ ,<br>$p < 0.001$  |
|                                          | CC       | (11/9)<br>OR = 1.62, $\chi^2 = 1.18$ ,<br>$p = 0.28$    | (8/11)<br>OR = 0.96, $\chi^2 = 0.01$ ,<br>$p = 0.93$    | (1/4)<br>OR = 0.33, $\chi^2 = 1.08$ ,<br>$p = 0.30$      |
| <b><i>GEN1</i><br/>rs300171</b>          | CC       | (191/231)<br>OR = 1.10, $\chi^2 = 0.82$ ,<br>$p = 0.36$ | (179/258)<br>OR = 0.89, $\chi^2 = 1.16$ ,<br>$p = 0.28$ | (47/69)<br>OR = 0.88, $\chi^2 = 0.40$ ,<br>$p = 0.53$    |
|                                          | CT       | (206/263)<br>OR = 1.03, $\chi^2 = 0.10$ ,<br>$p = 0.75$ | (228/271)<br>OR = 1.13, $\chi^2 = 1.50$ ,<br>$p = 0.22$ | (32/82)<br>OR = 0.50, $\chi^2 = 11.27$ ,<br>$p < 0.001$  |
|                                          | TT       | (87/88)<br>OR = 1.32, $\chi^2 = 3.19$ ,<br>$p = 0.07$   | (62/82)<br>OR = 0.99, $\chi^2 = 0.00$ ,<br>$p = 0.96$   | (10/22)<br>OR = 0.59, $\chi^2 = 1.91$ ,<br>$p = 0.17$    |
| <b><i>XRCC2</i><br/>rs3218547</b>        | CC       | (299/352)<br>OR = 1.18, $\chi^2 = 3.32$ ,<br>$p = 0.07$ | (283/369)<br>OR = 1.03, $\chi^2 = 0.09$ ,<br>$p = 0.76$ | (48/108)<br>OR = 0.57, $\chi^2 = 10.00$ ,<br>$p < 0.001$ |

|  |    |                                                              |                                                              |                                                            |
|--|----|--------------------------------------------------------------|--------------------------------------------------------------|------------------------------------------------------------|
|  | CA | (169/224)<br>OR = 1.01, $\chi^2 = 0.00$ ,<br><i>p</i> = 0.96 | (176/218)<br>OR = 1.09, $\chi^2 = 0.60$ ,<br><i>p</i> = 0.44 | (37/59)<br>OR = 0.83, $\chi^2 = 0.77$ ,<br><i>p</i> = 0.38 |
|  | AA | (18/27)<br>OR = 0.89, $\chi^2 = 0.16$ ,<br><i>p</i> = 0.69   | (22/39)<br>OR = 0.75, $\chi^2 = 1.19$ ,<br><i>p</i> = 0.27   | (5/11)<br>OR = 0.60, $\chi^2 = 0.89$ ,<br><i>p</i> = 0.34  |

OR = odds ratio. Significant results in bold.

**Supplementary Table SIV: SNPs in HRe genes associated with OS in the whole CRC cases and stratified for tumor site (Cox regression for adjusted estimates)**

**Supplementary Table SV: SNPs in HRe genes associated with EFS in the whole CRC cases and stratified for tumor site (Cox regression for adjusted estimates)**

**Supplementary Table SVI: SNPs in NHEJ genes associated with OS in the whole CRC cases and stratified for tumor site (Cox regression for adjusted estimates)**

**Supplementary Table SVII: SNPs in NHEJ genes associated with EFS in the whole CRC cases and stratified for tumor site (Cox regression for adjusted estimates)**

**Supplementary Table SVIII: miRNAs predicted to bind in the region surrounding *MRE11A* rs2155209 and *RAD52* rs11226 SNPs by different tools**

| Gene and polymorphism   | Tool for SNP prediction miRNAs                                                                          | miRNAs shared by different tools for prediction | miRNA entry in miRBase | Expression in colon (Genecards) <sup>1</sup>                |
|-------------------------|---------------------------------------------------------------------------------------------------------|-------------------------------------------------|------------------------|-------------------------------------------------------------|
| <i>MRE11A</i> rs2155209 | microSNIPer ( <a href="http://cbdb.nimh.nih.gov/microsniper">http://cbdb.nimh.nih.gov/microsniper</a> ) |                                                 |                        |                                                             |
|                         | hsa-miR-1234-3p                                                                                         |                                                 | MIMAT0005589           | Expressed in colon (microarray)                             |
|                         | <i>hsa-miR-1258</i>                                                                                     |                                                 | MIMAT0005909           | No Expression Related Data Available                        |
|                         | hsa-miR-1267                                                                                            |                                                 | MIMAT0005921           | Scarcely expressed in colon (RNAseq)                        |
|                         | <b>hsa-miR-1296</b>                                                                                     | X                                               | MIMAT0005794           | Expressed in colon and sigmoideum (RNAseq)                  |
|                         | hsa-miR-26b-3p                                                                                          |                                                 | MIMAT0004500           | Scarcely expressed in colon (RNAseq)                        |
|                         | hsa-miR-27a-5p                                                                                          | X                                               | MIMAT0004501           | Expressed in colon transverse (less in sigmoideum) (RNAseq) |
|                         | hsa-miR-2909                                                                                            |                                                 | MIMAT0013863           | No Expression Related Data Available                        |
|                         | <b>hsa-miR-296-5p</b>                                                                                   |                                                 | MIMAT0000690           | Expressed in colon (sigmoideum, transverse) (RNAseq)        |
|                         | hsa-miR-3158-3p                                                                                         | X                                               | MIMAT0015032           | Expressed in colon transverse (less in sigmoideum) (RNAseq) |
|                         | hsa-miR-3655                                                                                            |                                                 | MIMAT0018075           | Highly expressed in colon (sigmoideum, transverse) (RNAseq) |
|                         | hsa-miR-4446-3p                                                                                         |                                                 | MIMAT0018965           | No Expression Related Data Available                        |

|               |                                                                                                                                  |   |              |                                                                            |
|---------------|----------------------------------------------------------------------------------------------------------------------------------|---|--------------|----------------------------------------------------------------------------|
|               | hsa-miR-4512                                                                                                                     |   | MIMAT0019049 | Expressed in colon transverse (less in sigmoideum) (RNAseq)                |
|               | hsa-miR-4726-5p                                                                                                                  |   | MIMAT0019845 | Scarcely expressed in colon (RNAseq)                                       |
|               | hsa-miR-5001-5p                                                                                                                  |   | MIMAT0021021 | Highly expressed in colon (sigmoideum, transverse) (RNAseq)                |
|               | <i>hsa-miR-5683</i>                                                                                                              |   | MIMAT0022472 | No Expression Related Data Available                                       |
|               | hsa-miR-600                                                                                                                      |   | MIMAT0003268 | Expressed in colon (microarray)                                            |
|               | <i>hsa-miR-6069</i>                                                                                                              |   | MIMAT0023694 | No Expression Related Data Available                                       |
|               | hsa-miR-6514-3p                                                                                                                  |   | MIMAT0025485 | No Expression Related Data Available                                       |
|               | <b>Polymirt</b> ( <a href="http://compbio.uthsc.edu/miR SNP">http://compbio.uthsc.edu/miR SNP</a> )                              |   |              |                                                                            |
|               | hsa-miR-5088-5p                                                                                                                  |   |              | Scarcely expressed in colon (RNAseq)                                       |
|               | hsa-miR-6895                                                                                                                     |   |              | No Expression Related Data Available                                       |
|               | hsa-miR-7160-3p                                                                                                                  |   |              | No Expression Related Data Available                                       |
|               | <b>Mirnsnp score</b> ( <a href="http://www.bigr.medisin.ntnu.no/mirsnpscore/">http://www.bigr.medisin.ntnu.no/mirsnpscore/</a> ) |   |              |                                                                            |
|               | hsa-miR-3158 (now hsa-miR-3158-3p)                                                                                               | X |              | Expressed in colon transverse (less in sigmoideum) (RNAseq)                |
|               | hsa-miR-2861                                                                                                                     |   |              | No Expression Related Data Available                                       |
|               | <b>hsa-miR-1296</b>                                                                                                              | X |              | Expressed in colon and sigmoideum (RNAseq)                                 |
|               | hsa-miR-27a* (now hsa-miR-27a-5p)                                                                                                | X |              | Expressed in colon transverse (less in sigmoideum) (RNAseq)                |
|               | hsa-miR-214* (hsa-miR-214-5p)                                                                                                    |   |              | Highly expressed in colon (sigmoideum, transverse) (RNAseq)                |
| RAD52 rs11226 | <b>microSNIPer</b> ( <a href="http://cbdb.nih.gov/microsniper">http://cbdb.nih.gov/microsniper</a> )                             |   |              |                                                                            |
|               | <b>hsa-miR-296-5p</b>                                                                                                            |   | MIMAT0000690 | Expressed in colon (sigmoideum, transverse) (RNAseq)                       |
|               | <i>hsa-miR-3614-5p</i>                                                                                                           |   | MIMAT0017992 | Highly expressed in colon (sigmoideum, transverse) (RNAseq)                |
|               | hsa-miR-4260                                                                                                                     |   | MIMAT0016881 | Highly expressed in colon (sigmoideum, transverse) (RNAseq)                |
|               | <i>hsa-miR-496</i>                                                                                                               |   | MIMAT0002818 | Moderately expressed in colon transverse (scarcely in sigmoideum) (RNAseq) |
|               | <i>hsa-miR-541-3p</i>                                                                                                            |   | MIMAT0004920 | Moderately expressed in colon transverse (scarcely in sigmoideum) (RNAseq) |
|               | hsa-miR-1225-3p                                                                                                                  |   | MIMAT0005573 | Expressed in colon and sigmoideum (RNAseq)                                 |
|               | <b>hsa-miR-1296</b>                                                                                                              |   | MIMAT0005794 | Expressed in colon and sigmoideum (RNAseq)                                 |
|               | <i>hsa-miR-3136-3p</i>                                                                                                           | X | MIMAT0019203 | Scarcely expressed in colon (RNAseq)                                       |
|               | hsa-miR-4690-3p                                                                                                                  |   | MIMAT0019780 | Scarcely expressed in colon (RNAseq)                                       |
|               | hsa-miR-890                                                                                                                      |   | MIMAT0004912 | Scarcely expressed in colon (RNAseq)                                       |
|               | <i>hsa-miR-1233-1-5p</i>                                                                                                         |   | MIMAT0022943 | No Expression Related Data Available                                       |
|               | hsa-miR-1233-3p                                                                                                                  |   | MIMAT0005588 | No Expression Related Data Available                                       |

|  |                                                                                                     |   |              |                                                            |
|--|-----------------------------------------------------------------------------------------------------|---|--------------|------------------------------------------------------------|
|  | hsa-miR-1587                                                                                        |   | MIMAT0019077 | No Expression Related Data Available                       |
|  | hsa-miR-3147                                                                                        |   | MIMAT0015019 | No Expression Related Data Available                       |
|  | <i>hsa-miR-3151</i>                                                                                 |   | MIMAT0015024 | No Expression Related Data Available                       |
|  | hsa-miR-3189-3p                                                                                     |   | MIMAT0015071 | No Expression Related Data Available                       |
|  | <i>hsa-miR-5591-5p</i>                                                                              |   | MIMAT0022301 | No Expression Related Data Available                       |
|  | hsa-miR-6075                                                                                        |   | MIMAT0023700 | No Expression Related Data Available                       |
|  | hsa-miR-6724-5p                                                                                     |   | MIMAT0025856 | No Expression Related Data Available                       |
|  | <b>Polymirt<br/>(<a href="http://compbio.uthsc.edu/miRSNP">http://compbio.uthsc.edu/miRSNP</a>)</b> |   |              |                                                            |
|  | <i>hsa-miR-3136-3p</i>                                                                              | X | MIMAT0019203 | Scarcely expressed in colon (RNAseq)                       |
|  | hsa-miR-635                                                                                         |   |              | Highly expressed in colon (sigmoideum,transverse) (RNAseq) |

In Italics miRNAs shared by both alleles. In bold miRNAs shared by both SNPs

<sup>1</sup>For RNAseq data retrieved from GTEx, for microarray from BioGPS.
